# Supplementary material for: Detection of quinolone antibiotics with electrochemiluminescence of bimetallic ruthenium complex [(bpy)2Ru(bpy)(CH2)8(bpy)Ru(bpy)2]4+
Source: Royal Society of Chemistry journal article supplement (doi:10.1039/c4ay00632a), 2014-01-01
Supplement: c4ay00632a1.pdf [file c4ay00632a1.pdf]

## Supporting Information

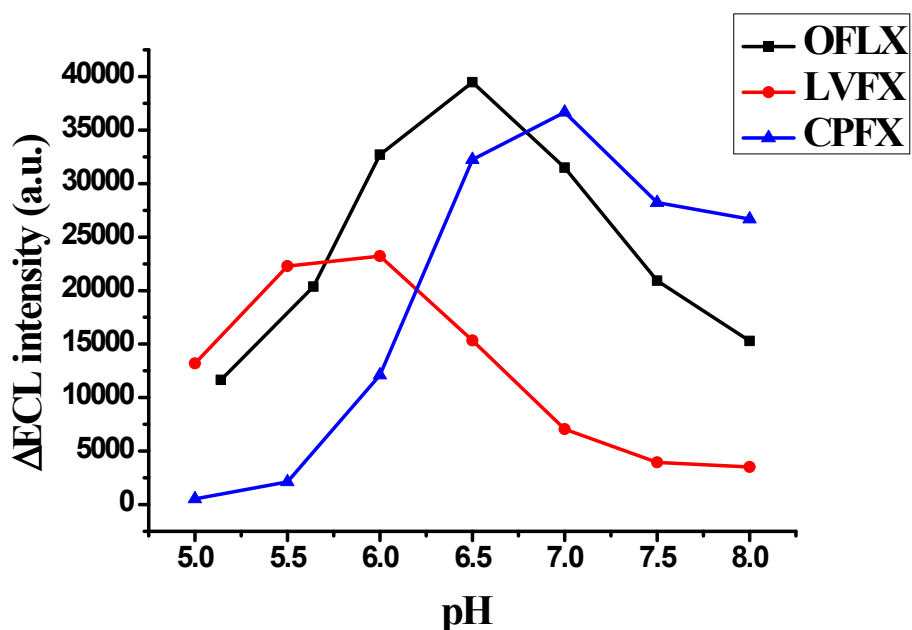

**Fig. S1** Dependence of the ECL increase versus the pH with  $1.0 \times 10^{-5}$  mol/L **1** and  $1.0 \times 10^{-6}$  mol/L corresponding quinolone antibiotics in 0.10 mol/L phosphate buffer at GC electrode.  $\Delta\text{ECL} = \text{ECL}_{\text{after addition of analyte}} - \text{ECL}_{\text{before addition of analyte}}$ .

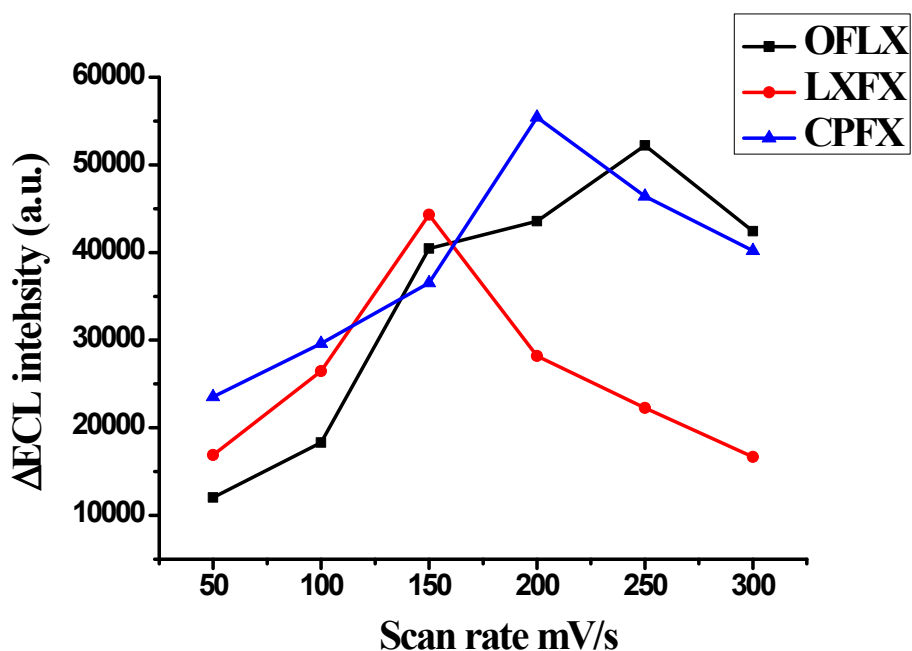

**Fig. S2** The effect of different scan rate on ECL with  $1.0 \times 10^{-5}$  mol/L **1** and  $1.0 \times 10^{-6}$  mol/L corresponding quinolone antibiotics in 0.10 mol/L phosphate buffer (pH=6.5, 6.0 and 7.0 for OFLX, LVFX and CPFX, respectively) at GC electrode.  $\Delta\text{ECL} = \text{ECL}_{\text{after addition of analyte}} - \text{ECL}_{\text{before addition of analyte}}$ .

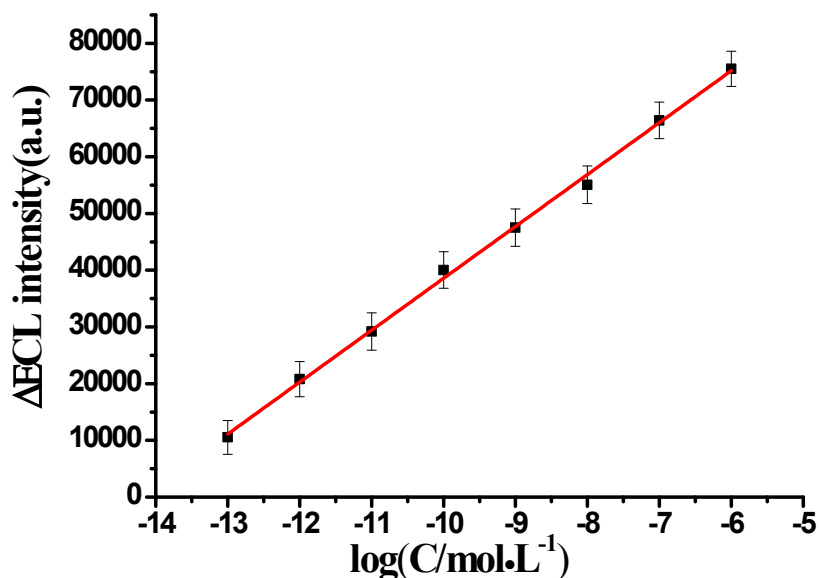

**Fig. S3** Dependence of the  $\Delta ECL$  increase versus the logarithmic concentration of OFLX with  $1.0 \times 10^{-4}$  mol/L **1** in 0.10 mol/L phosphate buffer (pH 6.5) at GC electrode.  $\Delta ECL = ECL_{\text{after addition of OFLX}} - ECL_{\text{before addition of OFLX}}$

A good linear calibration curve (Fig. S3) between the  $\Delta ECL$  ( $\Delta ECL = ECL_{\text{after addition of OFLX}} - ECL_{\text{before addition of OFLX}}$ ) and the logarithmic concentration of OFLX ( $\log[\text{OFLX}]$ ) can be established over the concentration range from  $1.0 \times 10^{-13}$  to  $1.0 \times 10^{-6}$  mol/L for OFLX. The regression equation was  $\Delta ECL = 129995.83 + 9144.17 \times \log[\text{OFLX}]$  with a linear coefficient  $R^2 = 0.99$ . The quantitation limit for OFLX is  $1.0 \times 10^{-13}$  mol/L ( $3.61 \times 10^{-11}$  g/L), which is much lower than the MRLs (the maximum residue in milk is 75  $\mu\text{g/kg}$  for OFLX) set by the European Union (EU) and the Joint FAO/WHO Expert Committee on Food Additives (JECFA).

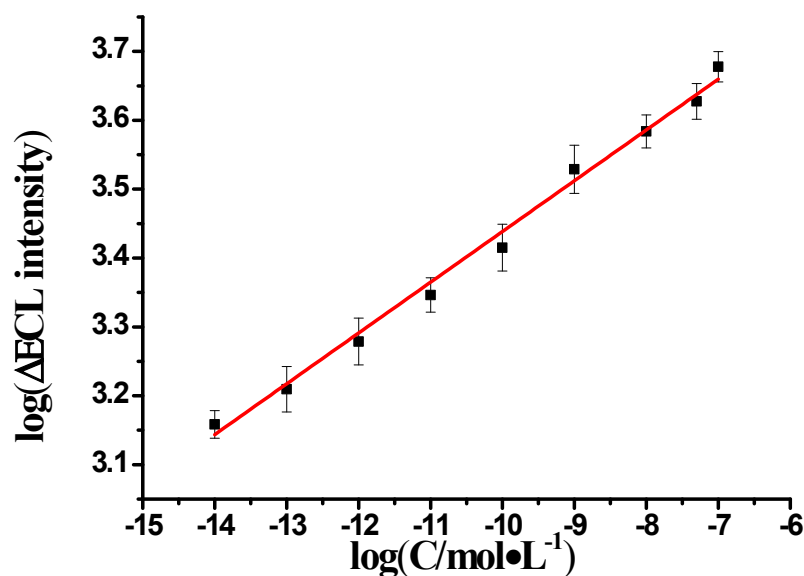

**Fig. S4** Dependence of the logarithmic of  $\Delta ECL$  increase versus the logarithmic concentration of LVFX with  $1.0 \times 10^{-4}$  mol/L **1** in 0.10 mol/L phosphate buffer (pH 6.0) at GC electrode.  $\Delta ECL = ECL_{\text{after addition of LVFX}} - ECL_{\text{before addition of LVFX}}$ .

A good linear calibration curve (Fig. S4) between the logarithmic of  $\Delta ECL$  ( $\Delta ECL = ECL_{\text{after addition of LVFX}} - ECL_{\text{before addition of LVFX}}$ ) and the logarithmic concentration of LVFX ( $\log[LVFX]$ ) can be established over the concentration range from  $1.0 \times 10^{-14}$  to  $1.0 \times 10^{-6}$  mol/L for LVFX. The regression equation was  $\log \Delta ECL = 4.18 + 0.08 \times \log[LVFX]$  with a linear coefficient  $R^2 = 0.99$ . The quantitation limit for LVFX is  $1.0 \times 10^{-14}$  mol/L ( $3.61 \times 10^{-12}$  g/L), which is much lower than the MRLs (the maximum residue in milk is 75  $\mu\text{g/kg}$  for LVFX) set by the European Union (EU) and the Joint FAO/WHO Expert Committee on Food Additives (JECFA).

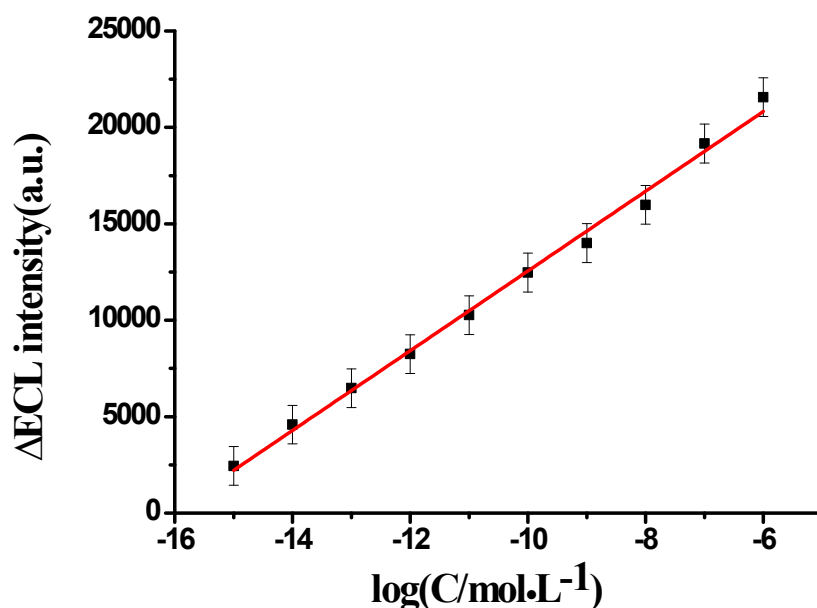

**Fig. S5** Dependence of the  $\Delta ECL$  increase versus the logarithmic concentration of CPFEX with  $1.0 \times 10^{-4}$  mol/L **1** in 0.10 mol/L phosphate buffer (pH 7.0) at GC electrode.  $\Delta ECL = ECL_{\text{after addition of CPFEX}} - ECL_{\text{before addition of the CPFEX}}$ .

A good linear calibration curve (Fig. S5) between  $\Delta ECL$  ( $\Delta ECL = ECL_{\text{after addition of CPFEX}} - ECL_{\text{before addition of the CPFEX}}$ ) and the logarithmic concentration of CPFEX ( $\log[CPFEX]$ ) can be established over the concentration range from  $1.0 \times 10^{-15}$  to  $1.0 \times 10^{-6}$  mol/L for CPFEX. The regression equation was  $\Delta ECL = 33231 + 2067.67 \times \log[CPFEX]$  with a linear coefficient  $R^2 = 0.99$ . The CPFEX quantitation limit is down to  $1.0 \times 10^{-15}$  mol/L ( $3.31 \times 10^{-13}$  g/L), which is much lower than the MRLs (the maximum residue in milk is 100  $\mu\text{g/kg}$  for CPFEX) set by the European Union (EU) and the Joint FAO/WHO Expert Committee on Food Additives (JECFA).

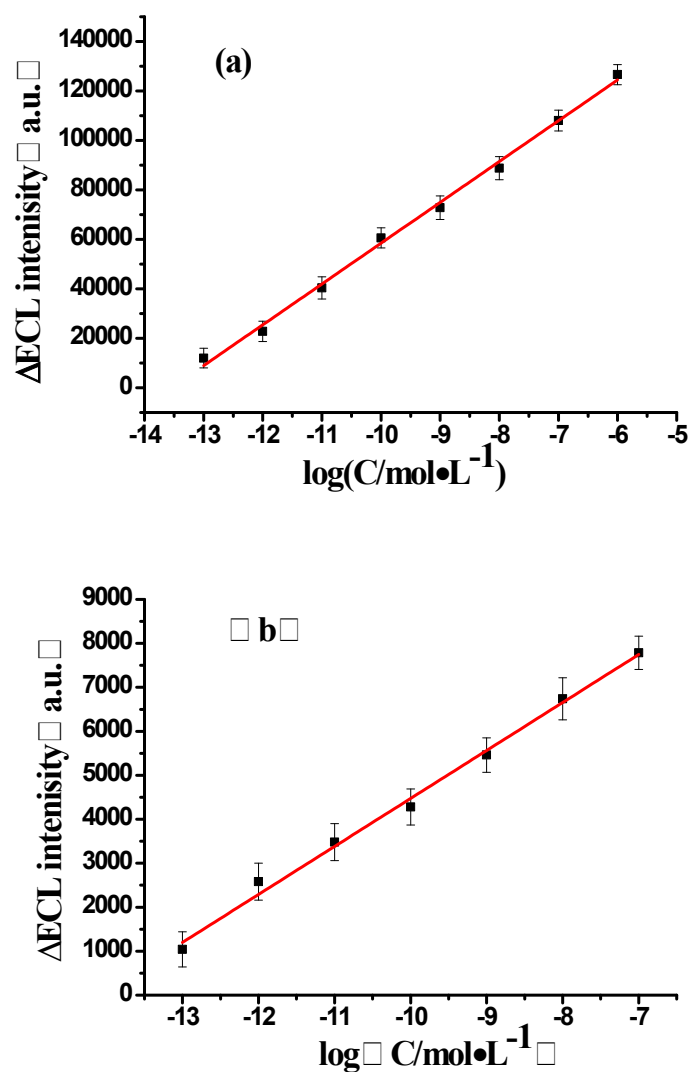

**Fig. S6** Dependence of the  $\Delta ECL$  increase versus the logarithmic concentration of NFLX with  $1.0 \times 10^{-4}$  mol/L **1** in 0.10 mol/L phosphate buffer (pH 7.0) at Au electrode (a) and Pt electrode (b).  $\Delta ECL = ECL_{\text{after addition of NFLX}} - ECL_{\text{before addition of NFLX}}$ .

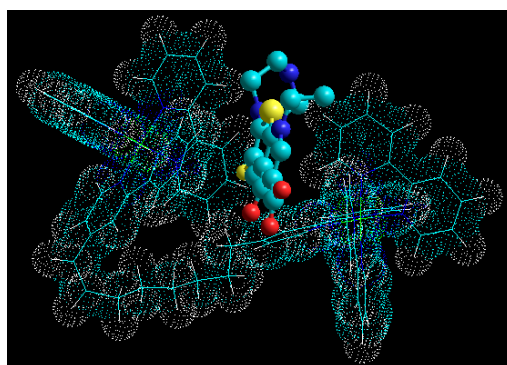

**Fig. S7** Optimized molecular modeling of **1** (stick) and NFLX (ball) with Ru-, N-, C- and H-atom in green, blue, cyan and white color, respectively.

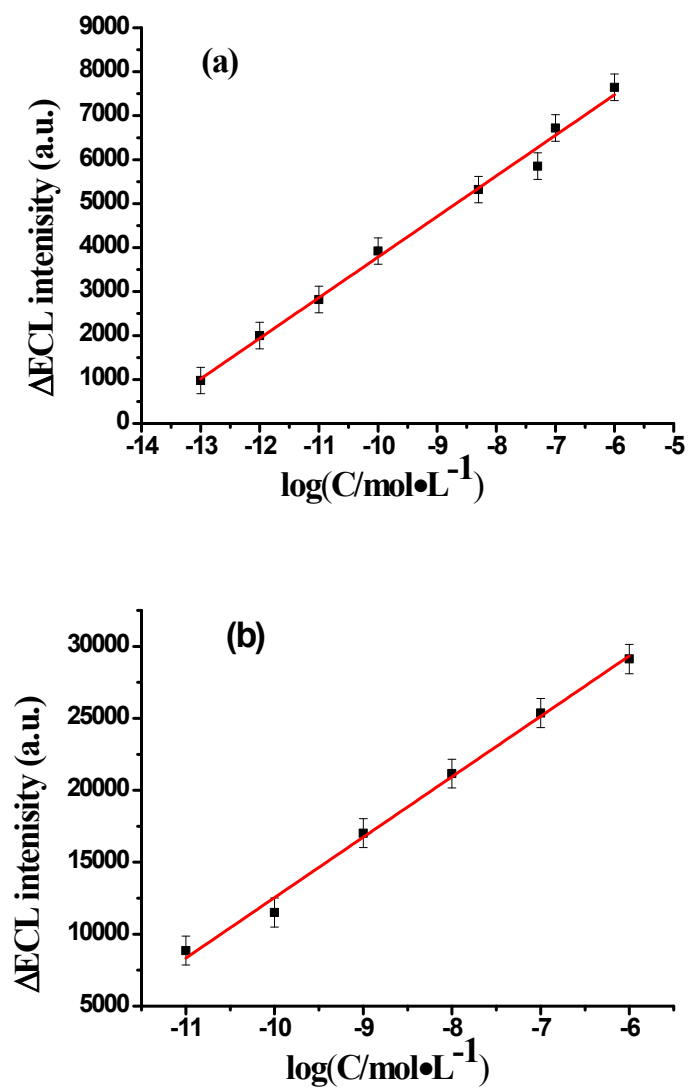

**Fig. S8** (a) Dependence of the  $\Delta ECL$  increase versus the logarithmic concentration of NFLX with  $5.0 \times 10^{-5}$  mol/L **1** in 0.10 mol/L phosphate buffer (pH = 7.0) at GC electrode. (b) Dependence of the  $\Delta ECL$  increase versus the logarithmic concentration of NFLX with  $1.0 \times 10^{-4}$  mol/L  $\text{Ru}(\text{bpy})_3^{2+}$  in 0.1.0 mol/L phosphate buffer (pH = 7.0) at GC electrode.  $\Delta ECL = ECL_{\text{after addition of NFLX}} - ECL_{\text{before addition of NFLX}}$

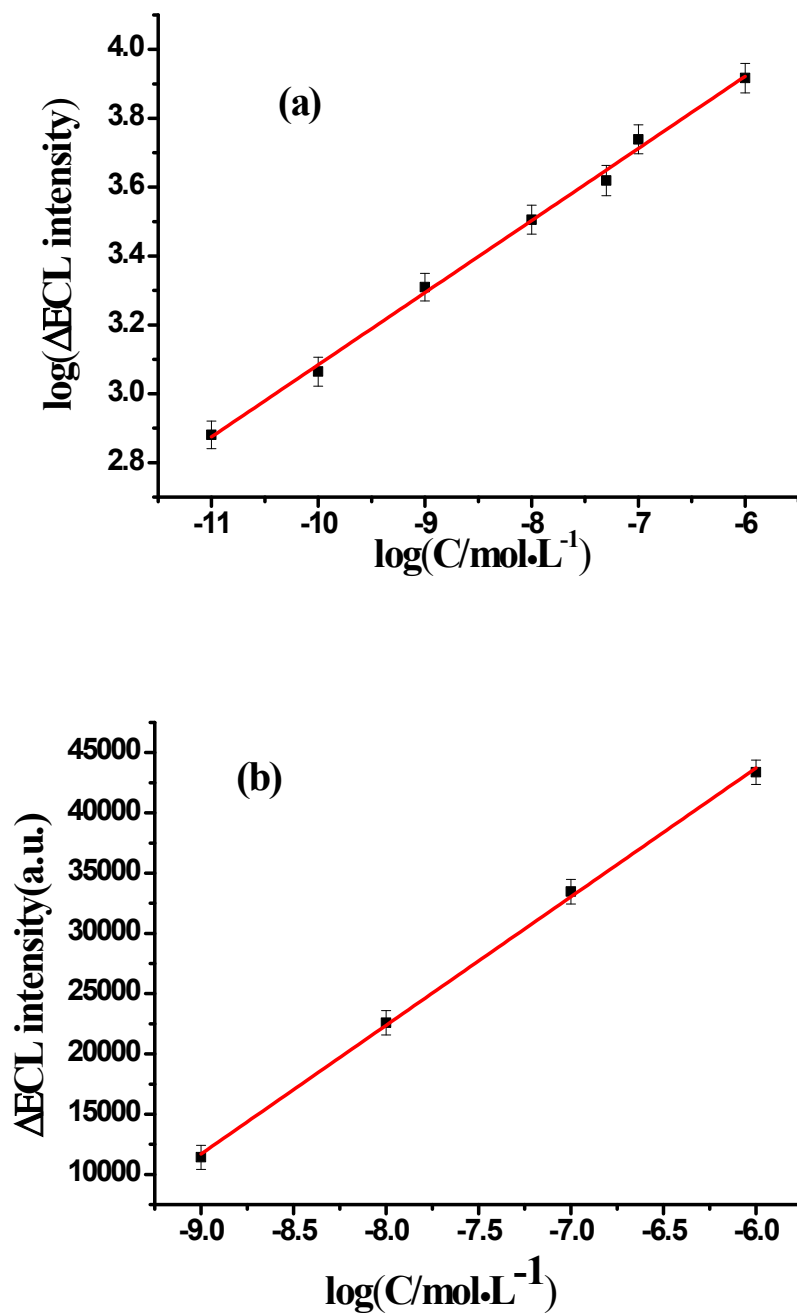

**Fig. S9** (a) Dependence of the logarithmic  $\Delta ECL$  increase versus the logarithmic concentration of OFLX with  $5.0 \times 10^{-5}$  mol/L **1** in 0.10 mol/L phosphate buffer (pH = 6.5) at GC electrode. (b) Dependence of the  $\Delta ECL$  increase versus the logarithmic concentration of OFLX with  $1.0 \times 10^{-4}$  mol/L  $\text{Ru}(\text{bpy})_3^{2+}$  in 0.10 mol/L phosphate buffer (pH = 6.5) at GC electrode.  $\Delta ECL = ECL_{\text{after addition of OFLX}} - ECL_{\text{before addition of OFLX}}$

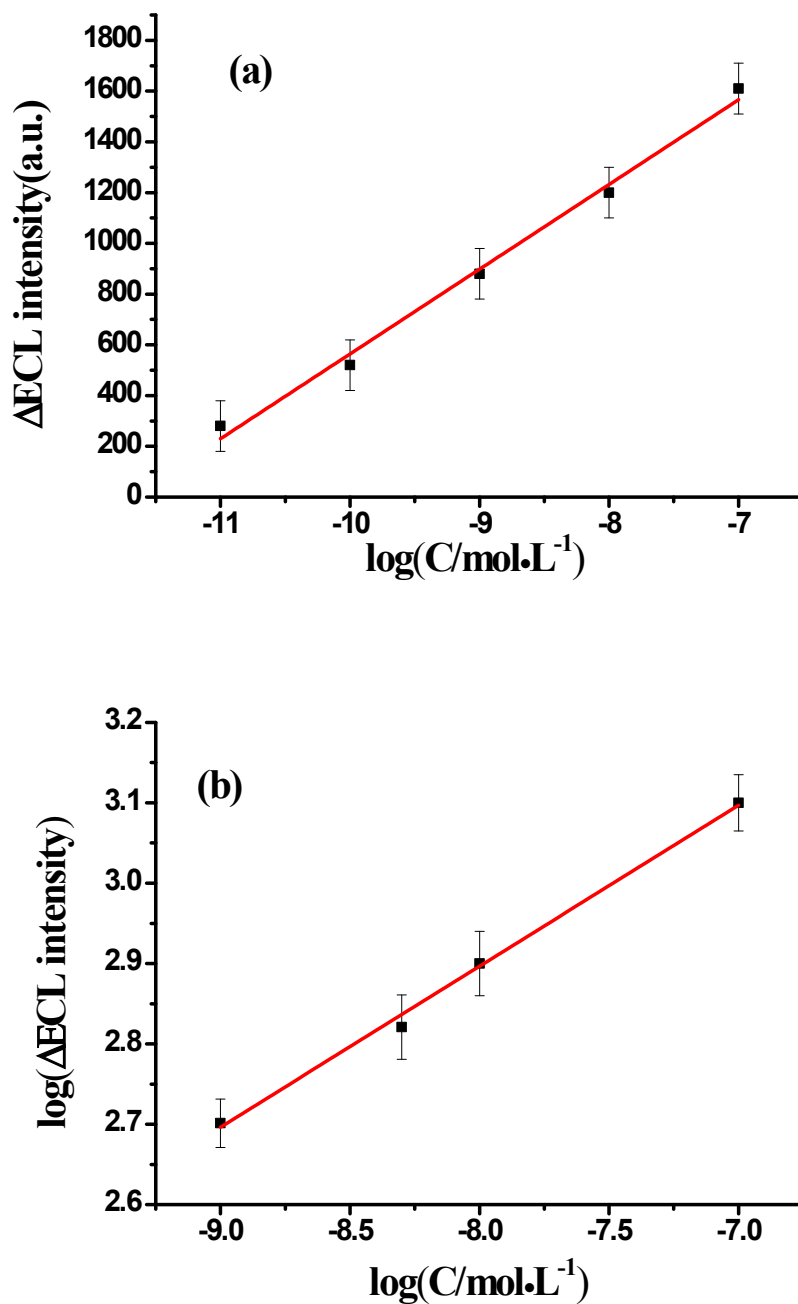

**Fig. 10** (a) Dependence of the  $\Delta ECL$  increase versus the logarithmic concentration of LVFX with  $5.0 \times 10^{-5}$  mol/L **1** in 0.10 mol/L phosphate buffer (pH = 6.0) at GC electrode. (b) Dependence of the logarithmic of  $\Delta ECL$  increase versus the logarithmic concentration of LVFX with  $1.0 \times 10^{-4}$  mol/L  $\text{Ru}(\text{bpy})_3^{2+}$  in 0.10 mol/L phosphate buffer (pH = 6.0) at GC electrode.  $\Delta ECL = ECL_{\text{after addition of LVFX}} - ECL_{\text{before addition of LVFX}}$



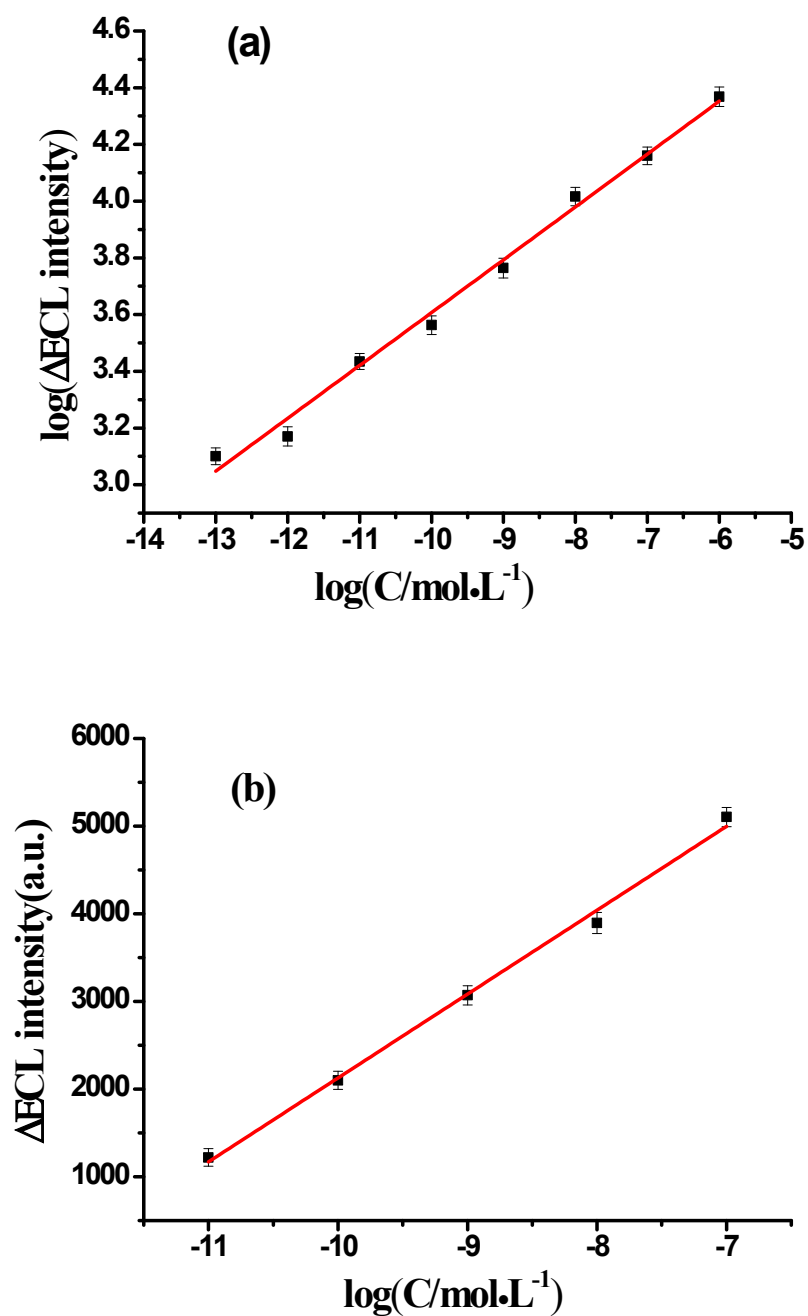

**Fig. S11** (a) Dependence of the logarithmic of  $\Delta ECL$  increase versus the logarithmic concentration of CPFX with  $5.0 \times 10^{-5}$  mol/L **1** in 0.10 mol/L phosphate buffer (pH = 7.0) at GC electrode. (b) Dependence of the  $\Delta ECL$  increase versus the logarithmic concentration of CPFX with  $1.0 \times 10^{-4}$  mol/L  $\text{Ru}(\text{bpy})_3^{2+}$  in 0.10 mol/L phosphate buffer (pH = 7.0) at GC electrode.  $\Delta ECL = ECL_{\text{after addition of CPFX}} - ECL_{\text{before addition of CPFX}}$

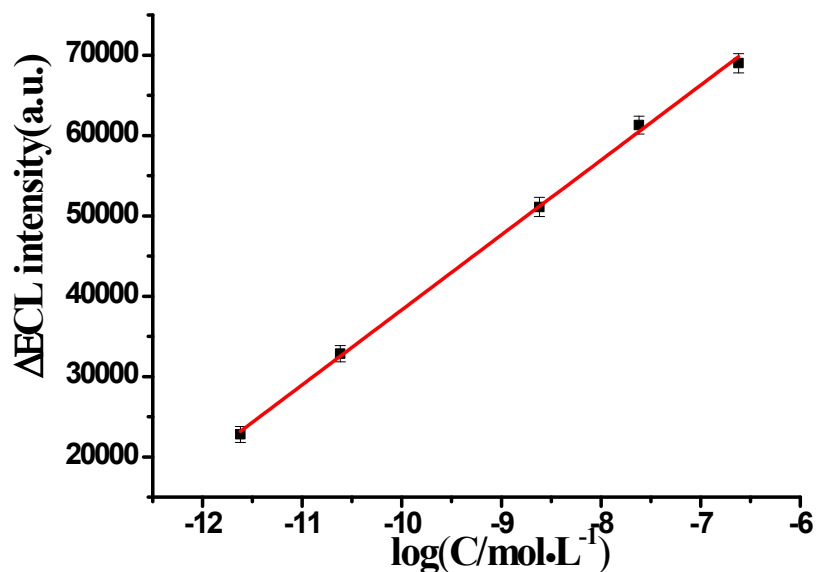

**Fig. S12** Dependence of the  $\Delta ECL$  increase versus the logarithmic concentration of the OFLX in milk samples with  $1.0 \times 10^{-4}$  mol/L **1** in 0.10 mol/L phosphate buffer (pH 6.5) at GC electrode.  $\Delta ECL = ECL_{\text{after addition of the milk samples}} - ECL_{\text{before addition of the milk samples}}$

A good linear calibration curve (Fig. S12) between the  $\Delta ECL$  ( $\Delta ECL = ECL_{\text{after addition of the milk samples}} - ECL_{\text{before addition of the milk samples}}$ ) and the logarithmic concentration of OFLX ( $\log[\text{OFLX}]$ ) can be established over the concentration range from  $2.4 \times 10^{-12}$  to  $2.4 \times 10^{-7}$  mol/L for OFLX. The regression equation was  $\Delta ECL = 133907.44 + 9568.60 \times \log[\text{OFLX}]$  with a linear coefficient  $R^2 = 0.99$ . The OFLX quantitation limit is down to  $2.4 \times 10^{-12}$  mol/L ( $8.67 \times 10^{-10}$  g/L), which is much lower than the MRLs (the maximum residue in milk is 75  $\mu\text{g/kg}$  for ofloxacin) set by the European Union (EU) and the Joint FAO/WHO Expert Committee on Food Additives (JECFA).

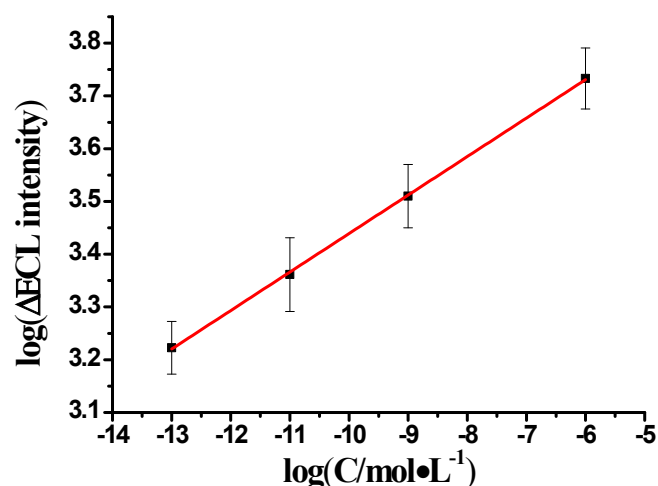

**Fig. S13** Dependence of the logarithmic of  $\Delta ECL$  increase versus the logarithmic concentration of the LVFX in milk samples with  $1.0 \times 10^{-4}$  mol/L **1** in 0.10 mol/L phosphate buffer (pH 6.0) at GC electrode.  $\Delta ECL = ECL_{\text{after addition of the milk samples}} - ECL_{\text{before addition of the milk samples}}$

A good linear calibration curve (Fig. S13) between the logarithmic of  $\Delta ECL$  ( $\Delta ECL = ECL_{\text{after addition of the milk samples}} - ECL_{\text{before addition of the milk samples}}$ ) and the logarithmic concentration of LVFX ( $\log[\text{LVFX}]$ ) can be established over the concentration range from  $1.0 \times 10^{-13}$  to  $1.0 \times 10^{-6}$  mol/L for LVFX. The regression equation was  $\log \Delta ECL = 4.17 + 0.07 \times \log[\text{LVFX}]$  with a linear coefficient  $R^2 = 0.99$ . The LVFX quantitation limit is down to  $1.0 \times 10^{-13}$  mol/L ( $3.61 \times 10^{-11}$  g/L), which is much lower than the MRLs (the maximum residue in milk is 75  $\mu\text{g/kg}$  for LVFX) set by the European Union (EU) and the Joint FAO/WHO Expert Committee on Food Additives (JECFA).

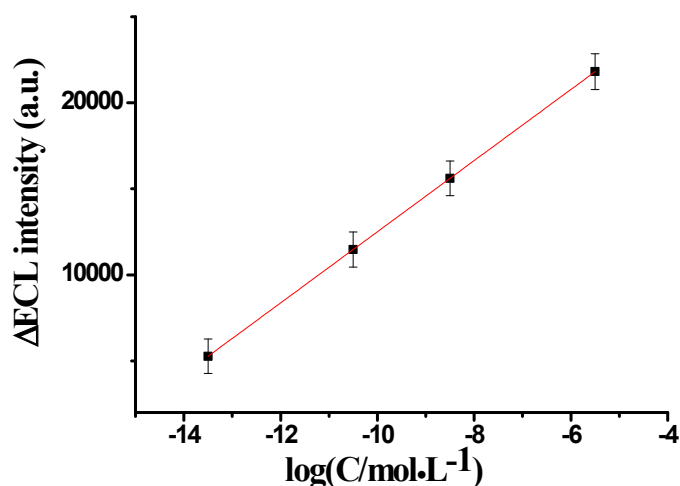

**Fig. S14** Dependence of the  $\Delta ECL$  increase versus the logarithmic concentration of the CPFEX in milk samples with  $1.0 \times 10^{-4}$  mol/L **1** in 0.10 mol/L phosphate buffer (pH 7.0) at GC electrode.

$$\Delta ECL = ECL_{\text{after addition of the milk samples}} - ECL_{\text{before addition of the milk samples}}$$

A good linear calibration curve (Fig. S14) between the  $\Delta ECL$  ( $\Delta ECL = ECL_{\text{after addition of the milk samples}} - ECL_{\text{before addition of the milk samples}}$ ) and the logarithmic concentration of CPFEX ( $\log[CPFEX]$ ) can be established over the concentration range from  $3.0 \times 10^{-14}$  to  $3.0 \times 10^{-6}$  mol/L for CPFEX. The regression equation was  $\Delta ECL = 33182.31 + 2067.56 \times \log[CPFEX]$  with a linear coefficient  $R^2 = 0.99$ . The CPFEX quantitation limit is down to  $3.00 \times 10^{-14}$  mol/L ( $9.94 \times 10^{-12}$  g/L), which is much lower than the MRLs (the maximum residue in milk is 100  $\mu\text{g/kg}$  for CPFEX) set by the European Union (EU) and the Joint FAO/WHO Expert Committee on Food Additives (JECFA).

**Table S1** Recoveries of the OFLX , LVFX and CPFEX added into milk samples detected by  $1.0 \times 10^{-4}$  mol/L **1** in 0.10 mol/L phosphate buffer (pH=6.5, 6.0 and 7.0 for OFLX, LVFX and CPFEX, respectively ) at GC electrode.<sup>a</sup>

| Sample                            | Added (mol/L)         | Detected (mol/L)        | Average (mol/L)        | Recovery | RSD   |
|-----------------------------------|-----------------------|-------------------------|------------------------|----------|-------|
| The milk samples containing OFLX  | $2.4 \times 10^{-12}$ | $2.39 \times 10^{-12}$  | $2.38 \times 10^{-12}$ | 99.02%   | 2.29% |
|                                   | $2.4 \times 10^{-12}$ | $2.29 \times 10^{-12}$  |                        |          |       |
|                                   | $2.4 \times 10^{-12}$ | $2.45 \times 10^{-12}$  |                        |          |       |
|                                   | $2.4 \times 10^{-11}$ | $2.50 \times 10^{-11}$  | $2.43 \times 10^{-11}$ | 101.25%  | 2.30% |
|                                   | $2.4 \times 10^{-11}$ | $2.39 \times 10^{-11}$  |                        |          |       |
|                                   | $2.4 \times 10^{-11}$ | $2.40 \times 10^{-11}$  |                        |          |       |
|                                   | $2.4 \times 10^{-8}$  | $2.45 \times 10^{-8}$   | $2.45 \times 10^{-8}$  | 101.90%  | 2.29% |
|                                   | $2.4 \times 10^{-8}$  | $2.50 \times 10^{-8}$   |                        |          |       |
|                                   | $2.4 \times 10^{-8}$  | $2.39 \times 10^{-8}$   |                        |          |       |
|                                   | $2.4 \times 10^{-7}$  | $2.50 \times 10^{-7}$   | $2.48 \times 10^{-7}$  | 103.40%  | 1.24% |
|                                   | $2.4 \times 10^{-7}$  | $2.45 \times 10^{-7}$   |                        |          |       |
|                                   | $2.4 \times 10^{-7}$  | $2.50 \times 10^{-7}$   |                        |          |       |
| The milk samples containing LVFX  | $1.0 \times 10^{-13}$ | $1.02 \times 10^{-13}$  | $1.03 \times 10^{-13}$ | 100.27%  | 1.05% |
|                                   | $1.0 \times 10^{-13}$ | $1.02 \times 10^{-13}$  |                        |          |       |
|                                   | $1.0 \times 10^{-13}$ | $1.04 \times 10^{-13}$  |                        |          |       |
|                                   | $1.0 \times 10^{-11}$ | $1.01 \times 10^{-11}$  | $1.00 \times 10^{-11}$ | 100.00%  | 0.58% |
|                                   | $1.0 \times 10^{-11}$ | $1.00 \times 10^{-11}$  |                        |          |       |
|                                   | $1.0 \times 10^{-11}$ | $1.00 \times 10^{-11}$  |                        |          |       |
|                                   | $1.0 \times 10^{-9}$  | $0.99 \times 10^{-9}$   | $0.99 \times 10^{-9}$  | 99.00%   | 1.34% |
|                                   | $1.0 \times 10^{-9}$  | $1.00 \times 10^{-9}$   |                        |          |       |
|                                   | $1.0 \times 10^{-9}$  | $0.97 \times 10^{-9}$   |                        |          |       |
|                                   | $1.0 \times 10^{-6}$  | $1.00 \times 10^{-6}$   | $1.01 \times 10^{-6}$  | 101.30%  | 1.50% |
|                                   | $1.0 \times 10^{-6}$  | $1.01 \times 10^{-6}$   |                        |          |       |
|                                   | $1.0 \times 10^{-6}$  | $1.03 \times 10^{-6}$   |                        |          |       |
| The milk samples containing CPFEX | $3.0 \times 10^{-14}$ | $3.03 \times 10^{-14}$  | $3.01 \times 10^{-14}$ | 100.32%  | 0.75% |
|                                   | $3.0 \times 10^{-14}$ | $3.012 \times 10^{-14}$ |                        |          |       |
|                                   | $3.0 \times 10^{-14}$ | $2.98 \times 10^{-14}$  |                        |          |       |
|                                   | $3.0 \times 10^{-11}$ | $3.02 \times 10^{-11}$  | $2.96 \times 10^{-11}$ | 98.50%   | 2.04% |
|                                   | $3.0 \times 10^{-11}$ | $2.90 \times 10^{-11}$  |                        |          |       |
|                                   | $3.0 \times 10^{-11}$ | $2.95 \times 10^{-11}$  |                        |          |       |
|                                   | $3.0 \times 10^{-9}$  | $2.99 \times 10^{-9}$   | $2.96 \times 10^{-9}$  | 98.60%   | 1.86% |
|                                   | $3.0 \times 10^{-9}$  | $3.00 \times 10^{-9}$   |                        |          |       |
|                                   | $3.0 \times 10^{-9}$  | $2.90 \times 10^{-9}$   |                        |          |       |
|                                   | $3.0 \times 10^{-6}$  | $3.09 \times 10^{-6}$   | $3.03 \times 10^{-6}$  | 101.00%  | 1.83% |
|                                   | $3.0 \times 10^{-6}$  | $3.02 \times 10^{-6}$   |                        |          |       |
|                                   | $3.0 \times 10^{-6}$  | $2.98 \times 10^{-6}$   |                        |          |       |

<sup>a</sup> Average of three samples, each sample was measured repeatedly for at least 7 times, and the averaged readings were used.

The relative deviations of less than 2.30% and the recoveries of 98.50-103.40% for OFLX, LVFX and CPFEX showed the fine accuracy, further demonstrated the potential application of this method for the determination of quinolone antibiotics residues in milk.

**Table S2** Precision studies results of the milk sample containing OFLX were detected by  $1.0 \times 10^{-4}$  mol/L **1** in 0.10 mol/L phosphate buffer (pH 7.0)<sup>a</sup>

| Sample | No. | Concentration<br>(mol/L) | Intraday precision<br>ECL intensity(a.u.) | Interday precision<br>ECL intensity(a.u.) |
|--------|-----|--------------------------|-------------------------------------------|-------------------------------------------|
| NFLX   | 1   | $1.0 \times 10^{-9}$     | 122480                                    | 124598                                    |
|        | 2   | $1.0 \times 10^{-9}$     | 118733                                    | 130851                                    |
|        | 3   | $1.0 \times 10^{-9}$     | 120779                                    | 122897                                    |
|        | 4   | $1.0 \times 10^{-9}$     | 123214                                    | 125332                                    |
|        | 5   | $1.0 \times 10^{-9}$     | 122765                                    | 124883                                    |
|        | 6   | $1.0 \times 10^{-9}$     | 122729                                    | 124847                                    |
| Mean   |     |                          | 121783.33                                 | 125568.00                                 |
| SD     |     |                          | 1714.83                                   | 2721.40                                   |
| RSD(%) |     |                          | 1.40                                      | 2.10                                      |

<sup>a</sup> Average of three samples, each sample was measured repeatedly for at least 7 times, and the averaged readings were used.

**Table S3** Precision studies results of the milk sample containing OFLX were detected by  $1.0 \times 10^{-4}$  mol/L **1** in 0.10 mol/L phosphate buffer (pH 6.5)<sup>a</sup>

| Sample | No. | Concentration<br>(mol/L) | Intraday precision<br>ECL intensity(a.u.) | Interday precision<br>ECL intensity(a.u.) |
|--------|-----|--------------------------|-------------------------------------------|-------------------------------------------|
| OFLX   | 1   | $1.0 \times 10^{-9}$     | 59250                                     | 59580                                     |
|        | 2   | $1.0 \times 10^{-9}$     | 59380                                     | 59480                                     |
|        | 3   | $1.0 \times 10^{-9}$     | 58970                                     | 58980                                     |
|        | 4   | $1.0 \times 10^{-9}$     | 59230                                     | 59460                                     |
|        | 5   | $1.0 \times 10^{-9}$     | 59340                                     | 59490                                     |
|        | 6   | $1.0 \times 10^{-9}$     | 59310                                     | 58980                                     |
| Mean   |     |                          | 59246.60                                  | 59238.33                                  |
| SD     |     |                          | 146.24                                    | 290.20                                    |
| RSD(%) |     |                          | 0.24                                      | 0.48                                      |

<sup>a</sup> Average of three samples, each sample was measured repeatedly for at least 7 times, and the averaged readings were used.

**Table S4** Precision studies results of milk sample containing LVFX were detected by  $1.0 \times 10^{-4}$  mol/L **1** in 0.10 mol/L phosphate buffer (pH 6.0)<sup>a</sup>

| Sample | No. | Concentration<br>(mol/L) | Intraday precision<br>ECL intensity(a.u.) | Interday precision<br>ECL intensity(a.u.) |
|--------|-----|--------------------------|-------------------------------------------|-------------------------------------------|
| LVFX   | 1   | $1.0 \times 10^{-9}$     | 15920                                     | 16100                                     |
|        | 2   | $1.0 \times 10^{-9}$     | 15970                                     | 15980                                     |
|        | 3   | $1.0 \times 10^{-9}$     | 15890                                     | 14990                                     |
|        | 4   | $1.0 \times 10^{-9}$     | 15960                                     | 15890                                     |
|        | 5   | $1.0 \times 10^{-9}$     | 14980                                     | 15970                                     |
|        | 6   | $1.0 \times 10^{-9}$     | 15890                                     | 15930                                     |
| Mean   |     |                          | 15768.33                                  | 15810.00                                  |
| SD     |     |                          | 146.24                                    | 407.87                                    |
| RSD(%) |     |                          | 0.24                                      | 2.50                                      |

<sup>a</sup> Average of three samples, each sample was measured repeatedly for at least 7 times, and the averaged readings were used.

**Table S5** Precision studies Results of milk sample containing CPFEX precision studies were detected by  $1.0 \times 10^{-4}$  mol/L **1** in 0.10 mol/L phosphate buffer (pH 7.0)<sup>a</sup>

| Sample | No. | Concentration<br>(mol/L) | Intraday precision<br>ECL intensity(a.u.) | Interday precision<br>ECL intensity(a.u.) |
|--------|-----|--------------------------|-------------------------------------------|-------------------------------------------|
| CPFEX  | 1   | $1.0 \times 10^{-9}$     | 26590                                     | 26280                                     |
|        | 2   | $1.0 \times 10^{-9}$     | 26670                                     | 26290                                     |
|        | 3   | $1.0 \times 10^{-9}$     | 26580                                     | 25980                                     |
|        | 4   | $1.0 \times 10^{-9}$     | 26790                                     | 26780                                     |
|        | 5   | $1.0 \times 10^{-9}$     | 26560                                     | 26260                                     |
|        | 6   | $1.0 \times 10^{-9}$     | 26430                                     | 26270                                     |
| Mean   |     |                          | 26603.33                                  | 26310.00                                  |
| SD     |     |                          | 119.90                                    | 258.90                                    |
| RSD(%) |     |                          | 0.45                                      | 0.98                                      |

<sup>a</sup> Average of three samples, each sample was measured repeatedly for at least 7 times, and the averaged readings were used.
